# Supplementary material for: The Public Bicycle as a Feeder Mode for Metro Commuters in the Megacity Beijing: Travel Behavior, Route Environment, and Socioeconomic Factors
Source: Atypon-hosted journal article supplement (doi:10.1061/(asce)up.1943-5444.0000785), 2021-11-09
Supplement: supplemental_materials_up.1943-5444.0000785_zhao.pdf [file supplemental_materials_up.1943-5444.0000785_zhao.pdf]

## SUPPLEMENTAL MATERIALS

*ASCE Journal of Urban Planning and Development*

# The Public Bicycle as a Feeder Mode for Metro Commuters in the Megacity Beijing: Travel Behavior, Route Environment, and Socioeconomic Factors

Pengjun Zhao, Dandan Yuan, and Yixue Zhang

**DOI:** 10.1061/(ASCE)UP.1943-5444.0000785

© ASCE 2021

[www.ascelibrary.org](http://www.ascelibrary.org)

## Survey on Commuting Transfer Behavior around Metro Stations in Beijing

Number: \_\_\_\_\_

Dear Sir/Madam,

Thank you for your time. This survey aims to discuss about your choice of feeder mode while taking metro for commuting. This survey is used for academic research, and all responses are anonymous. Your response is of significant value to our study and the improvements of transportation policy in Beijing.

Wish you good health and happy life.

Department of Urban and Regional Planning, Peking University  
Professor Zhao Pengjun

### 1. Information about the travel behavior

- 1) You are going \_\_\_\_\_ now.
  - a. into the metro station. b. out of the metro station.
- 2) Your origin and destination of the daily commuting by metro are \_\_\_\_\_ (the metro station near your home) and \_\_\_\_\_ (the metro station near your work place).
- 3) On your way home/when going to work, which kind of feeder mode do you usually choose to get into/out of the metro station?
  - a. walk. b. public bicycle. c. bus (waiting for \_\_\_minutes). d. taxi. e. private bicycle. f. electric bicycle. g. motorcycle. h. private car. i. other \_\_\_\_\_
- 4) If you have selected 'public bicycle' in question 3, please tell us the reason (for example, its advantages compared with other modes): \_\_\_\_\_
- 5) If you have not selected 'public bicycle' in question 3, please tell us the reason (for example, its disadvantages compared with other modes): \_\_\_\_\_
- 6) In the last week, how many times do you go shopping around the metro station near your home? \_\_\_\_\_ how many times do you go catering or for leisure around the metro station near you home? \_\_\_\_\_
- 7) In the last week, how many times do you go shopping around the metro station near your work place? \_\_\_\_\_ how many times do you go catering or for leisure around the metro station near you work place? \_\_\_\_\_
- 8) What other services do you wish to be added around the metro station? (for example, supermarket, drugstore, vegetable store and so on) \_\_\_\_\_

### 2. Information about your socioeconomic situation (no real name required, please feel free to fill in the blanks)

- 1) Your gender is \_\_\_\_\_
  - a. male. b. female.
- 2) Your age is \_\_\_\_\_
- 3) The type of your employment is \_\_\_\_\_
  - a. agriculture b. manufacturing and mining c. accommodation and catering d. financial e. property f. renting and commercial services g. electricity, gas, fuel and water conservation h.

building construction i. geology and water conservancy j. transportation k. education l. information transmission, computer and software m. wholesale and retail n. health, social security and social welfare o. cultural industry p. public management, social organizations and international organizations q. freelance r. students s. other \_\_\_\_.

4) Approximately, your monthly income is \_\_\_\_

- a. under 3000 CNY
- b. 3000-5000 CNY
- c. 5000-8000 CNY
- d. 8000-10000 CNY
- e. 10000-12000 CNY
- f. 12000-15000 CNY
- g. 15000-20000 CNY
- h. above 20000 CNY

5) Your education level is (the highest one till now) \_\_\_\_

- a. no formal education
- b. elementary school
- c. junior middle school
- d. junior high school (including higher vocational college, technical secondary school)
- e. university
- f. master/doctor

6) How many the following vehicles do you own and currently available at home?

- a. private bicycle \_\_\_\_
- b. electric bicycle
- c. motorcycle
- d. private car

7) Which of the vehicles in question 6 that you have taken as a feeder mode for your commute by metro? (multiple choice question)

- a. bus
- b. private bicycle
- c. public bicycle
- d. electric bicycle
- e. motorcycle
- f. private car
- g. walk
- h. other \_\_\_\_

8) Are you able to ride a bicycle?

- a. Yes, I am.
- b. No, I am not.
